# Supplementary material
Source: PubMed Central journal article supplement (PMC4685825)
Supplement: rspb20152236supp3.pdf [file rspb20152236supp3.pdf]

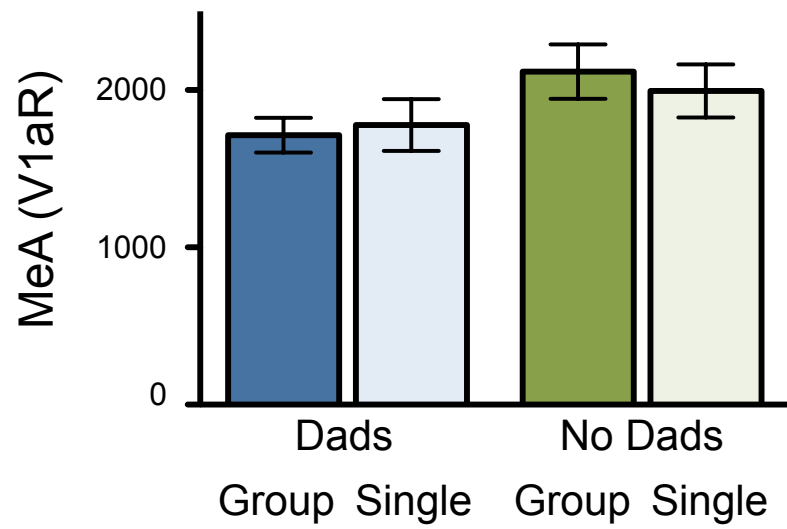

**Figure S2.** Mean ( $\pm$ SE) vasopressin 1a receptor (V1aR) density (dpm/mg TE) in the medial amygdala (MeA). Colors and shades for treatment groups correspond with figure 2a.
